# Supplementary material for: Probiotic interventions with highly acid-tolerant Levilactobacillus brevis strains improve lipid metabolism and gut microbial balance in obese mice
Source: Royal Society of Chemistry journal article supplement (doi:10.1039/d4fo03417a), 2024-12-02
Supplement: d4fo03417a1.pdf [file d4fo03417a1.pdf]

## Tables

**Table S1** Dietary energy distribution of NFD and HFD

| Nutritional components | NFD (kcal%) | HFD (kcal%) |
|------------------------|-------------|-------------|
| Protein                | 20          | 20          |
| Carbohydrate           | 70          | 20          |
| Fat                    | 10          | 60          |
| Total                  | 100         | 100         |

**Table S2** Composition of NFD and HFD

| Ingredient          | NFD     |        | HFD    |        |
|---------------------|---------|--------|--------|--------|
|                     | g       | kcal   | g      | kcal   |
| Casein              | 200     | 800    | 200    | 800    |
| L-Cystine           | 3       | 12     | 3      | 12     |
| Corn Starch         | 506.2   | 2024.8 | 0      | 0      |
| Maltodextrin 10     | 125     | 500    | 125    | 500    |
| Sucrose             | 72.8    | 291.2  | 72.8   | 291.2  |
| Cellulose, BW200    | 50      | 0      | 50     | 0      |
| Soybean Oil         | 25      | 225    | 25     | 225    |
| Lard                | 20      | 180    | 245    | 2205   |
| Mineral Mix S10026B | 50      | 0      | 50     | 0      |
| Vitamin Mix V10001C | 1       | 4      | 1      | 4      |
| Choline Bitartrate  | 2       | 0      | 2      | 0      |
| FD&C Yellow Dye #5  | 0.04    | 0      | 0      | 0      |
| FD&C Blue Dye #1    | 0.01    | 0      | 0.05   | 0      |
| Total               | 1055.05 | 4037   | 773.85 | 4037.2 |

## Figure legends

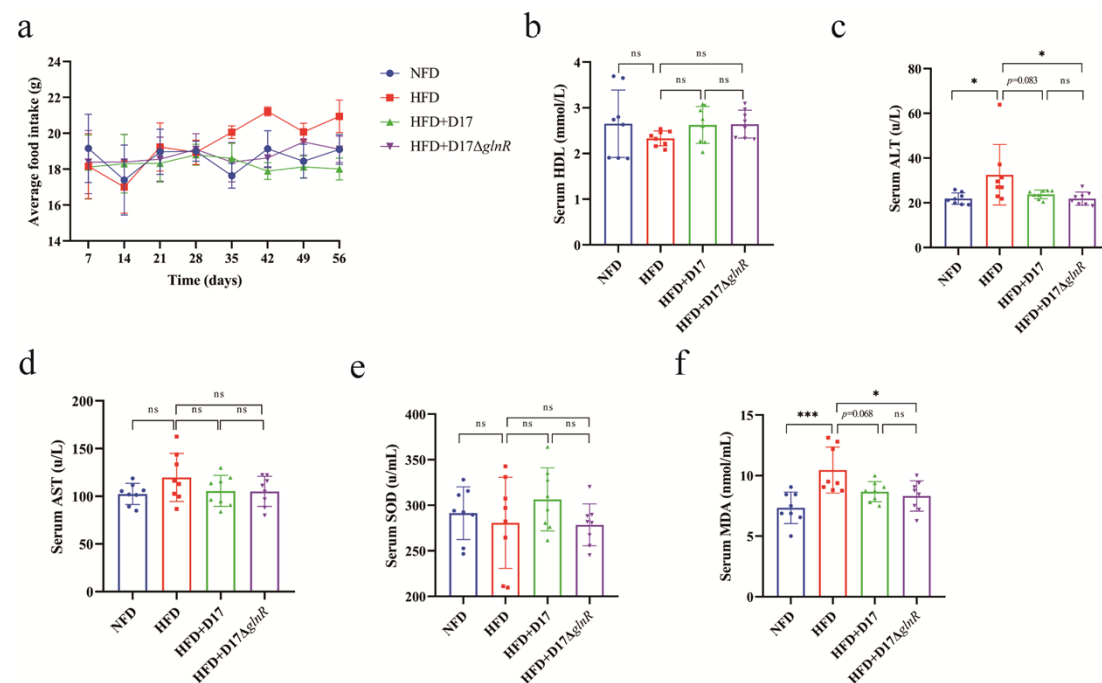

**Fig. S1.** *L. brevis* D17 and its *glnR*-deletion strain D17Δ*glnR* supplementation directly improved phenotypic metrics associated with obesity. (a) Average food intake. (b) Serum HDL. (c) Serum ALT. (d) Serum AST. (e) Serum SOD. (f) Serum MDA. The data are presented as mean ± SD, n=8. The statistical test was determined using one-way ANOVA with Tukey's post-hoc tests for multiple comparisons. ns, no significance; \*,  $p < 0.05$ ; \*\*,  $p < 0.01$ ; \*\*\*,  $p < 0.001$ .

a

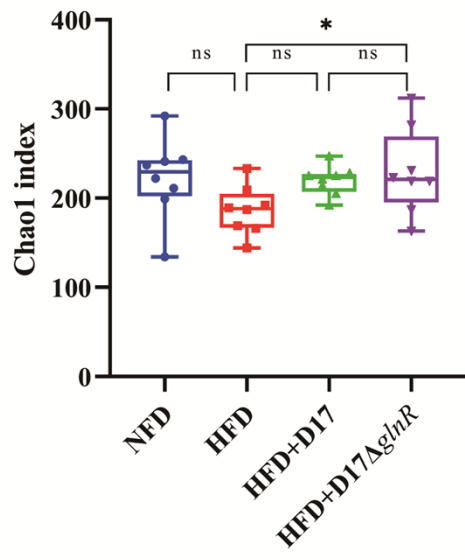

b

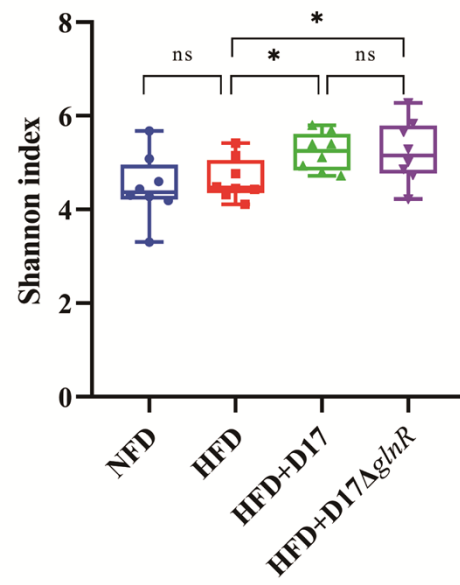

**Fig. S2.** Effects of *L. brevis* D17 and its *glnR*-deletion strain D17Δ*glnR* intervention on gut microbiota alpha diversity in mice. (a) Chao1 index. (b) Shannon index. The data are presented as mean  $\pm$  SD, n=8. The statistical test was determined using one-way ANOVA with Tukey's post-hoc tests for multiple comparisons. ns, no significance; \*,  $p < 0.05$ ; \*\*,  $p < 0.01$ ; \*\*\*,  $p < 0.001$ .
