# Supplementary material for: Probiotic interventions with highly acid-tolerant Levilactobacillus brevis strains improve lipid metabolism and gut microbial balance in obese mice
Source: Royal Society of Chemistry journal article supplement (doi:10.1039/d4fo03417a), 2024-12-02
Supplement: d4fo03417a2.xlsx [file d4fo03417a2.xlsx]

## Sheet: Sheet1
Species level abundance table based on metagenomic sequencing. The green highlighted bins indicate species within Muribaculaceae whose abundance decreased following the HFD intervention; the red highlighted bins are for species within Lachnospiraceae whose abundance increased following HFD intervention.
				NFD			HFD			HFD with L.brevis D17 (D17)			HFD with L.brevis D17ΔglnR (D17ΔglnR)
Genome	completeness	contamination	classification	0d	28d	56d	0d	28d	56d	0d	28d	56d	0d	28d	56d
bin1	97.98	1.62	d__Bacteria;p__Bacillota;c__Bacilli;o__Erysipelotrichales;f__Erysipelotrichaceae;g__Ileibacterium;s__Ileibacterium valens	0.95	22.6855	12.957	0.87	2.98	8.99149	0.75	11.924	11.2368	0.99	12.7751	11.3806
bin2	97.96	0	d__Bacteria;p__Verrucomicrobiota;c__Verrucomicrobiae;o__Verrucomicrobiales;f__Akkermansiaceae;g__Akkermansia;s__Akkermansia muciniphila	1.90623	0.647231	7.40733	0.920157	2.15154	1.08471	1.24799	3.14879	3.27106	0.937341	1.77989	4.51307
bin3	100	0.48	d__Bacteria;p__Actinomycetota;c__Actinomycetia;o__Actinomycetales;f__Bifidobacteriaceae;g__Bifidobacterium;s__Bifidobacterium globosum	1.39947	5.45358	5.261	0.582552	1.09821	0.398798	1.22063	2.18941	3.07434	0.90036	2.69238	3.75879
bin4	98.22	0.52	d__Bacteria;p__Desulfobacterota;c__Desulfovibrionia;o__Desulfovibrionales;f__Desulfovibrionaceae;g__Mailhella;s__Mailhella sp003512875	0.515201	2.3596	4.78381	0.477452	5.76556	7.34822	0.702468	6.8826	5.25175	0.664173	5.8347	4.25621
bin5	98.11	0.86	d__Bacteria;p__Bacillota;c__Bacilli;o__Erysipelotrichales;f__Erysipelotrichaceae;g__Faecalibaculum;s__Faecalibaculum sp910588395	0	2.97745	2.20088	0	9.11759	1.08109	0	1.27229	2.75579	0	1.28524	2.79188
bin6	99.52	0	d__Bacteria;p__Bacteroidota;c__Bacteroidia;o__Bacteroidales;f__Rikenellaceae;g__Rikenella;s__Rikenella sp910579375	0.074234	0.901185	1.94229	0.182638	0.314879	0.103378	0.13788	0.772139	0.473326	0.129149	0.516496	0.334651
bin7	92	1.2	d__Bacteria;p__Bacillota_A;c__Clostridia;o__Eubacteriales;f__Lachnospiraceae;g__UBA3282;s__UBA3282 sp910585555	0.0232785	0.0102141	1.90325	0.249003	0.0200394	0.0393576	0.0761016	0.0213187	0.0180903	0.0696943	0.0156781	0.021878
bin8	96.48	1.5	d__Bacteria;p__Bacteroidota;c__Bacteroidia;o__Bacteroidales;f__Muribaculaceae;g__CAG-485;s__CAG-485 sp002491945	9.11412	1.88894	1.79804	5.8025	0	0	10.1855	0.015734	1.3	9.63762	0	1.2
bin9	99.25	0.29	d__Bacteria;p__Bacteroidota;c__Bacteroidia;o__Bacteroidales;f__Muribaculaceae;g__Paramuribaculum;s__	1.53033	1.41577	1.6518	1.2579	0.180233	0.158883	0.963577	1.19821	0.63256	1.26783	0.295654	0.460997
bin10	99.48	2.33	d__Bacteria;p__Bacillota;c__Bacilli;o__Lactobacillales;f__Lactobacillaceae;g__Ligilactobacillus;s__Ligilactobacillus murinus	1.27128	0.703761	1.46787	0.507185	0.265473	0.615476	0.759282	0.347915	1.31036	1.06533	0.21578	1.59784
bin11	94.29	0.39	d__Bacteria;p__Bacillota;c__Bacilli;o__Erysipelotrichales;f__Erysipelotrichaceae;g__Dubosiella;s__Dubosiella sp004793885	0.731226	1.53967	1.44269	0.209766	1.08965	0.781767	0.349141	1.19471	1.67736	0.314976	1.08791	1.668
bin12	93.68	0	d__Bacteria;p__Bacteroidota;c__Bacteroidia;o__Bacteroidales;f__Bacteroidaceae;g__Bacteroides;s__Bacteroides acidifaciens	0	0	1.27121	0	0	0.503703	0	0	0	0	0	0
bin13	97.36	0.81	d__Bacteria;p__Bacteroidota;c__Bacteroidia;o__Bacteroidales;f__Muribaculaceae;g__CAG-873;s__CAG-873 sp002490635	2.24761	1.39244	1.21716	1.5273	0.103069	0.0690018	1.42305	0.200233	0.513827	1.95166	0.151045	0.3885
bin14	97.74	4.23	d__Bacteria;p__Bacteroidota;c__Bacteroidia;o__Bacteroidales;f__Muribaculaceae;g__CAG-485;s__CAG-485 sp002361215	0.802391	0.518753	0.98988	0.438914	0.0962281	0.444492	0.466918	0.333723	0.699437	0.645208	0.093843	0.613415
bin15	99.62	1.34	d__Bacteria;p__Bacteroidota;c__Bacteroidia;o__Bacteroidales;f__Tannerellaceae;g__Parabacteroides;s__Parabacteroides sp910577325	0.786462	0.233503	0.980629	0.310726	1.11908	1.04822	0.339967	2.20516	5.97786	0.360732	1.75301	1.03706
bin16	97.38	0.63	d__Bacteria;p__Bacteroidota;c__Bacteroidia;o__Bacteroidales;f__Bacteroidaceae;g__Cryptobacteroides;s__Cryptobacteroides sp910585445	0.8336	0.111413	0.873397	0.465217	3.69026	2.02345	0.371491	2.1872	7.20741	0.7276	2.63937	3.72575
bin17	99.19	0.19	d__Bacteria;p__Actinomycetota;c__Coriobacteriia;o__Coriobacteriales;f__Atopobiaceae;g__NM07-P-09;s__NM07-P-09 sp004793925	0.0920885	3.03283	0.872084	0.0518291	6.25702	2.39091	0.087843	1.96632	2.97164	0.0914365	3.44187	2.96334
bin18	98.18	0	d__Bacteria;p__Bacteroidota;c__Bacteroidia;o__Bacteroidales;f__Muribaculaceae;g__CAG-485;s__CAG-485 sp003979075	0.424158	0.405184	0.870832	0.237753	0.101989	0.757481	0.335591	0.500445	0.56332	0.441682	0.197035	0.42495
bin19	96.37	0.12	d__Bacteria;p__Bacillota_A;c__Clostridia;o__Christensenellales;f__UBA3700;g__MGBC100798;s__MGBC100798 sp910584975	0	0.0843077	0.736363	0.00648138	0	0	0.0131343	0	0	0.0146554	0	0
bin20	93.4	0.48	d__Bacteria;p__Bacillota;c__Bacilli;o__Erysipelotrichales;f__Erysipelotrichaceae;g__Faecalibaculum;s__Faecalibaculum rodentium	0	0.025756	0.636647	0	0	0	0	0	0.096447	0	0	0.0380724
bin21	94.53	0	d__Bacteria;p__Bacteroidota;c__Bacteroidia;o__Bacteroidales;f__Muribaculaceae;g__CAG-485;s__CAG-485 sp002361155	1.49745	0.811044	0.63328	0.896122	0.0381221	0.182724	0.872055	0.239505	1.23441	0.953759	0.0559266	1.16319
bin22	98.32	0.44	d__Bacteria;p__Bacillota_A;c__Clostridia;o__Oscillospirales;f__Oscillospiraceae;g__Lawsonibacter;s__Lawsonibacter sp910588635	0.297615	0.290075	0.599067	0.258529	5.64881	4.00741	0.348955	3.05924	2.10189	0.389318	4.94844	2.44114
bin23	97.17	0	d__Bacteria;p__Bacteroidota;c__Bacteroidia;o__Bacteroidales;f__Muribaculaceae;g__CAG-873;s__CAG-873 sp009775535	0.461946	0.847789	0.555435	0.251422	0.237189	0.285839	0.563152	0.328947	0.56941	0.542691	0.219111	0.976736
bin24	99.45	0.47	d__Bacteria;p__Bacillota;c__Bacilli;o__Lactobacillales;f__Lactobacillaceae;g__Limosilactobacillus;s__Limosilactobacillus reuteri_D	0.138384	0.265911	0.423595	0.0377603	0.340058	0.712494	0.0272478	0.186782	0.0201975	0.259662	0.178032	0.295546
bin25	93.57	3.5	d__Bacteria;p__Bacillota_A;c__Clostridia;o__Eubacteriales;f__Lachnospiraceae;g__UBA7109;s__UBA7109 sp910580235	0.0150944	0.458647	0.419899	0	1.82874	2.18898	0	3.88764	3.22261	0	2.4182	3.6484
bin26	98.12	0.75	d__Bacteria;p__Bacillota;c__Bacilli;o__Lactobacillales;f__Lactobacillaceae;g__Lactobacillus;s__Lactobacillus johnsonii	0.0582217	0.183787	0.40589	0.0664376	0.373886	0.798631	0.0210804	0.285973	1.02366	0.12199	0.175056	1.33989
bin27	95.72	0.52	d__Bacteria;p__Bacillota_A;c__Clostridia;o__Eubacteriales;f__Lachnospiraceae;g__UBA3282;s__	0.145733	0.200782	0.383912	0.126824	0.182339	2.43118	1.21461	0.335767	0.382846	0.342554	0.584394	0.626046
bin28	99.43	1.15	d__Bacteria;p__Bacteroidota;c__Bacteroidia;o__Bacteroidales;f__Muribaculaceae;g__Muribaculum;s__Muribaculum gordoncarteri	2.51475	0.675802	0.372445	1.04732	0.0447287	0.025513	1.22758	0.118203	1.11525	1.61296	0.0795509	1.02458
bin29	99.46	0	d__Bacteria;p__Bacteroidota;c__Bacteroidia;o__Bacteroidales;f__Marinifilaceae;g__Odoribacter;s__Odoribacter sp021771575	0.140483	0.1275	0.358247	0.0640677	0.186462	0.321441	0.0377448	0.25847	1.25473	0.0875618	0.216006	0.68488
bin30	90.49	0.81	d__Bacteria;p__Bacillota_A;c__Clostridia;o__Eubacteriales;f__Eubacteriaceae;g__Eubacterium_F;s__Eubacterium_F sp910589595	0.0748541	0.108646	0.317392	0.0502125	0	0	0.127492	0	0	0.0961078	0	0
bin31	96.55	0	d__Bacteria;p__Bacillota_A;c__Clostridia;o__Eubacteriales;f__Lachnospiraceae;g__CAG-95;s__CAG-95 sp000403495	0.073969	0.0169142	0.310643	0.294174	0.20156	4.4834	0.514689	0.377761	1.46845	0.237618	0.57217	2.31987
bin32	90.25	3.69	d__Bacteria;p__Bacteroidota;c__Bacteroidia;o__Bacteroidales;f__Muribaculaceae;g__CAG-485;s__CAG-485 sp009775355	0.197826	0.135286	0.293212	0.169214	0	0	0.125392	0	0	0.16794	0	0
bin33	99.52	0.38	d__Bacteria;p__Bacteroidota;c__Bacteroidia;o__Bacteroidales;f__Rikenellaceae;g__Tidjanibacter;s__Tidjanibacter sp910577285	0.426934	0.153219	0.276962	0.226223	0.105896	0.289979	0.174347	0.236686	1.02704	0.433593	0.239453	0.886236
bin34	99.06	0.19	d__Bacteria;p__Bacteroidota;c__Bacteroidia;o__Bacteroidales;f__Muribaculaceae;g__UBA7173;s__UBA7173 sp001689485	0.302898	0.418311	0.274405	0.153912	0.17696	0.166445	0.22068	0.310382	0.181514	0.204583	0.184007	0.260048
bin35	94.1	0	d__Bacteria;p__Bacillota;c__Bacilli;o__RF39;f__UBA660;g__UBA3789;s__UBA3789 sp910589335	0.0360848	0.0342253	0.273535	0.0331502	0.10624	0.267616	0.0167307	0.181279	0.435036	0.0536017	0.166091	0.0780324
bin36	99.06	0.75	d__Bacteria;p__Bacteroidota;c__Bacteroidia;o__Bacteroidales;f__Muribaculaceae;g__Paramuribaculum;s__Paramuribaculum intestinale	1.05821	0.289936	0.269104	0.271652	0.190762	0.0619403	0.815544	0.168588	0.496262	0.709819	0.177784	0.208599
bin37	98.3	1.75	d__Bacteria;p__Bacteroidota;c__Bacteroidia;o__Bacteroidales;f__Muribaculaceae;g__Paramuribaculum;s__Paramuribaculum sp001689565	0.434645	0.285052	0.253843	0.315979	0.0156187	0.0127958	0.513058	0.121187	0.0893924	0.566651	0.0291095	0.116103
bin38	99.06	0	d__Bacteria;p__Bacteroidota;c__Bacteroidia;o__Bacteroidales;f__Muribaculaceae;g__Paramuribaculum;s__Paramuribaculum sp910579675	0.918159	0.0383344	0.235775	0.624457	0	0	0.757969	0.0328916	0.343845	0.910171	0	0
bin39	97.08	2.62	d__Bacteria;p__Bacillota_A;c__Clostridia;o__Eubacteriales;f__Lachnospiraceae;g__MD308;s__MD308 sp910584615	0.0107234	0.203089	0.22079	0.0290489	0.199024	0.319449	0.0694094	0.146504	0.093644	0.0239565	0.117274	0.174136
bin40	97.04	1.92	d__Bacteria;p__Bacillota_A;c__Clostridia;o__Eubacteriales;f__Lachnospiraceae;g__1XD42-69;s__1XD42-69 sp011959925	0.017109	0.178861	0.214758	0.0394199	0.221867	1.23938	0.0671148	0.550668	0.785226	0.030282	0.243663	0.294057
bin41	95.86	5.03	d__Bacteria;p__Desulfobacterota;c__Desulfovibrionia;o__Desulfovibrionales;f__Desulfovibrionaceae;g__Desulfovibrio;s__Desulfovibrio sp009773975	0.031945	0.0587189	0.161896	0.11915	0	0	0.08279	0	0	0.0550357	0	0
bin42	99.19	1.36	d__Bacteria;p__Bacteroidota;c__Bacteroidia;o__Bacteroidales;f__Marinifilaceae;g__Odoribacter;s__Odoribacter sp910588375	0.717525	0.046225	0.160113	0.808261	0.295127	0.171797	0.309963	0.578693	0.707738	2.05818	0.14028	0.524962
bin43	97.99	1.17	d__Bacteria;p__Bacillota_A;c__Clostridia;o__Oscillospirales;f__Acutalibacteraceae;g__Acutalibacter;s__	0.0282975	0.0186474	0.147947	0.0216926	0.00818124	0.0085954	0.0155629	0.00879125	0.0122569	0.0331932	0	0
bin44	98.43	0.13	d__Bacteria;p__Bacillota_A;c__Clostridia;o__Eubacteriales;f__Lachnospiraceae;g__SIG307;s__SIG307 sp910577175	0.68188	0	0.14516	0.784163	0.409416	0.56392	0.331455	0.504525	0	0.351511	0.197205	0.309736
bin45	90.16	0	d__Bacteria;p__Bacillota_A;c__Clostridia;o__Oscillospirales;f__Oscillospiraceae;g__Marseille-P3106;s__Marseille-P3106 sp022799035	0.0243814	0.0488952	0.143771	0.0145223	0.0951282	0.0551689	0.0137473	0.12476	0.0607599	0.0255581	0.0963877	0.0740567
bin46	97.7	0.38	d__Bacteria;p__Bacillota_A;c__Clostridia;o__Eubacteriales;f__Lachnospiraceae;g__1XD42-69;s__	0.0187321	0.094693	0.141034	0.0616295	2.30184	1.99543	0.0806554	3.48961	1.36438	0.0894956	2.84785	2.05286
bin47	98.28	3.93	d__Bacteria;p__Bacillota_A;c__Clostridia;o__Eubacteriales;f__Lachnospiraceae;g__UBA3282;s__UBA3282 sp003612405	0.903645	0.0534644	0.140862	2.6508	0.0929758	0.200074	1.94974	0.0928846	0.0778194	0.780378	0.0840446	0.113394
bin48	96.86	1.17	d__Bacteria;p__Bacteroidota;c__Bacteroidia;o__Bacteroidales;f__Muribaculaceae;g__CAG-485;s__CAG-485 sp002362485	2.67447	0.0789625	0.140254	0.987716	0.00846383	0.00901731	1.58457	0.0157034	1.01879	1.11855	0.00702175	1.01265
bin49	92.95	6.51	d__Bacteria;p__Bacillota_A;c__Clostridia;o__Oscillospirales;f__Acutalibacteraceae;g__Acutalibacter;s__Acutalibacter muris	0.0047915	0.0468773	0.136165	0.00706116	0.224664	0.0211788	0.0126239	0.321325	0.0224598	0.0100346	0.227801	0.0348651
bin50	100	0	d__Bacteria;p__Bacteroidota;c__Bacteroidia;o__Chitinophagales;f__Chitinophagaceae;g__Sediminibacterium;s__Sediminibacterium magnilacihabitans	0.0816609	0.130397	0.13368	0.0394828	0.104666	0.0836876	0.0645026	0.0919807	0.0424151	0.153802	0.0664496	0.0688607
bin51	98.67	1.26	d__Bacteria;p__Bacillota;c__Bacilli;o__Acholeplasmatales;f__Anaeroplasmataceae;g__Pelethenecus;s__Pelethenecus sp910579215	0.0862268	0	0.132914	0.0268607	0	0	0.00703601	0	0	0.00722226	0	0
bin52	99.52	0	d__Bacteria;p__Bacteroidota;c__Bacteroidia;o__Bacteroidales;f__Rikenellaceae;g__Alistipes;s__Alistipes sp910580175	1.65167	0.0254139	0.130682	1.65176	1.02239	1.01935	1.36845	0	0.138838	3.3551	0	0.0302431
bin53	99.06	3.33	d__Bacteria;p__Bacteroidota;c__Bacteroidia;o__Bacteroidales;f__Muribaculaceae;g__Duncaniella;s__Duncaniella dubosii	5.49317	0.11489	0.130173	2.86278	0.0213957	0.0232579	3.95736	0.115477	2.09033	3.83787	0.0320881	2.05633
bin54	99.37	0.78	d__Bacteria;p__Bacillota_A;c__Clostridia;o__Eubacteriales;f__Lachnospiraceae;g__Merdisoma;s__Merdisoma sp910576325	0.0124486	0.0372993	0.130086	0.0147016	1.12738	1.58231	0.0333975	2.19387	1.74317	0.0136312	1.20163	2.20167
bin55	97.32	0.22	d__Bacteria;p__Bacillota_A;c__Clostridia;o__Eubacteriales;f__Eubacteriaceae;g__Eubacterium_R;s__Eubacterium_R sp011958665	0.0172654	0	0.13004	0.0116699	0.377267	0.620571	0.0828551	1.42881	0.327392	0.016441	0.605061	0.43018
bin56	94.07	0.5	d__Bacteria;p__Bacillota;c__Bacilli;o__Lactobacillales;f__Streptococcaceae;g__Streptococcus;s__Streptococcus danieliae	0.0176816	0.082604	0.128073	0.0163639	0.0352496	0.0723289	0.0164322	0.0512901	0.0566649	0.014434	0.0318309	0.0528539
bin57	97.28	1.58	d__Bacteria;p__Bacillota_A;c__Clostridia;o__Oscillospirales;f__Ruminococcaceae;g__Ruthenibacterium;s__	0.0248529	0.0464174	0.12483	0.026638	0.0312042	0.0364353	0.103515	0.0441535	0.0291341	0.0341535	0.0370677	0.0390686
bin58	94.83	5.06	d__Bacteria;p__Deferribacterota;c__Deferribacteres;o__Deferribacterales;f__Mucispirillaceae;g__Mucispirillum;s__Mucispirillum sp910586745	0.1968	0.250597	0.124719	7.12086	0.62832	0.883096	0.545872	0.387299	2.89952	1.13104	0.783373	0.530685
bin59	94.95	2.42	d__Bacteria;p__Bacteroidota;c__Bacteroidia;o__Bacteroidales;f__Muribaculaceae;g__CAG-873;s__CAG-873 sp011959565	0.587432	0.193562	0.123775	0.262482	0.0795735	0.0550171	0.589867	0.199194	0.220309	0.573726	0.0873167	0.452259
bin60	97.8	0	d__Bacteria;p__Bacteroidota;c__Bacteroidia;o__Bacteroidales;f__Muribaculaceae;g__CAG-485;s__CAG-485 sp009775365	0.808383	0.191609	0.120169	0.381694	0.00976221	0.0146429	0.685075	0.0147194	0.118314	0.476313	0.00955372	0.0453112
bin61	94.15	0	d__Bacteria;p__Bacteroidota;c__Bacteroidia;o__Bacteroidales;f__Muribaculaceae;g__CAG-873;s__CAG-873 sp009775225	0.399793	0.0589662	0.110154	0.347784	0	0	0.268512	0	0.0478356	0.583063	0	0
bin62	93.64	0	d__Bacteria;p__Bacillota_A;c__Clostridia;o__Eubacteriales;f__Lachnospiraceae;g__CAG-95;s__CAG-95 sp910587295	0.0154775	0.0177401	0.109037	0.029639	0.247754	0.153742	0.0452212	0.15757	0.120834	0.0327611	0.317765	0.0515487
bin63	90.17	8.06	d__Bacteria;p__Bacillota_A;c__Clostridia;o__Eubacteriales;f__Lachnospiraceae;g__1XD8-76;s__1XD8-76 sp910578085	0.00759042	0.040862	0.10813	0.0156143	0.108784	0.124511	0.0439136	0.251124	0.031777	0.0228202	0.198112	0.275002
bin64	95.19	2.67	d__Bacteria;p__Bacteroidota;c__Bacteroidia;o__Bacteroidales;f__Muribaculaceae;g__CAG-485;s__	0.0912223	0.0319281	0.100384	0.0477486	0	0	0.0457611	0	0	0.07035	0	0
bin65	94.41	0.51	d__Bacteria;p__Bacillota_A;c__Clostridia;o__Oscillospirales;f__Acutalibacteraceae;g__Acutalibacter;s__Acutalibacter sp009917445	0.0195931	0.217548	0.094709	0.0835484	0.0616436	0.0401257	0.0509141	0.0417149	0.0414092	0.0952253	0.05193	0.0524554
bin66	93.4	0	d__Bacteria;p__Bacteroidota;c__Bacteroidia;o__Bacteroidales;f__Muribaculaceae;g__Duncaniella;s__Duncaniella sp910578515	0.174304	0.0806747	0.0946814	0.103837	0	0.0106667	0.113659	0.017142	0.0419035	0.128959	0	0.021539
bin67	98.22	0.96	d__Bacteria;p__Desulfobacterota;c__Desulfovibrionia;o__Desulfovibrionales;f__Desulfovibrionaceae;g__Bilophila;s__	0.0187669	0.0273987	0.0800122	0.0145648	0.0122464	0.0180633	0.0584528	0.0132536	0.0225453	0.0343146	0.0101654	0.0305582
bin68	96.35	0.57	d__Bacteria;p__Bacteroidota;c__Bacteroidia;o__Bacteroidales;f__Muribaculaceae;g__CAG-485;s__CAG-485 sp009775375	4.89709	0	0.078764	1.69204	0	0	2.50876	0	0	2.5087	0	0
bin69	92.53	0	d__Bacteria;p__Bacillota_A;c__Clostridia;o__Eubacteriales;f__Lachnospiraceae;g__Acetatifactor;s__	0.0161968	0.0184096	0.07814	0.0554024	0.427748	0.54653	0.0763275	0.304814	0.367929	0.0472247	0.153232	0.768855
bin70	95.51	0.82	d__Bacteria;p__Bacillota;c__Bacilli;o__RF39;f__UBA660;g__UBA5578;s__	0.00718559	0.0837739	0.077653	0.00983238	0	0	0	0	0.00606143	0	0	0.203207
bin71	94.74	0	d__Bacteria;p__Bacteroidota;c__Bacteroidia;o__Bacteroidales;f__Muribaculaceae;g__Paramuribaculum;s__	0.587635	0.125998	0.0747388	0.203373	0.28892	0.0305584	0.235723	0.618049	0.936569	0.274843	0.370918	0.266592
bin72	97.61	2.61	d__Bacteria;p__Bacillota_A;c__Clostridia;o__Eubacteriales;f__Lachnospiraceae;g__Acetatifactor;s__Acetatifactor sp910578815	2.36702	0.0237789	0.0707758	12.1332	1.09805	2.1374	11.3663	0.0770652	0	8.77199	0.0691098	0.0845673
bin73	97.98	0	d__Bacteria;p__Bacteroidota;c__Bacteroidia;o__Bacteroidales;f__Rikenellaceae;g__Alistipes;s__Alistipes sp009774895	0.0915757	0.0626165	0.0705313	0.0478352	1.53909	2.23859	0.0597206	0.852283	1.46574	0.0951578	0.433544	0.8021
bin74	90.16	0	d__Bacteria;p__Bacillota_A;c__Clostridia;o__Christensenellales;f__UBA3700;g__MGBC100798;s__	0.00698605	0.0142858	0.0704539	0.00597533	0.0669622	0.0369443	0.0138531	0	0.00560131	0.00543936	0	0
bin75	92.06	0.84	d__Bacteria;p__Bacillota_A;c__Clostridia;o__Eubacteriales;f__Lachnospiraceae;g__COE1;s__COE1 sp009774245	0.0347927	0.0125422	0.0676956	0.0282109	0	0	0.413858	0	0	0.0806862	0	0
bin76	98.1	0.1	d__Bacteria;p__Bacillota_A;c__Clostridia;o__Oscillospirales;f__CAG-272;g__Avispirillum;s__	0.00703769	0.0326097	0.0663407	0.0048622	0.0339506	0.0313973	0.00753656	0.0391844	0.0285272	0.00851866	0.0485685	0.0303394
bin77	95.75	3.36	d__Bacteria;p__Bacillota_A;c__Clostridia;o__Oscillospirales;f__Ruminococcaceae;g__UBA3818;s__UBA3818 sp910587335	0.0152326	0.0409737	0.0633104	0.00982848	0.0202125	0.0251562	0.031522	0.0255822	0.0282316	0.00898163	0.0160396	0.0230723
bin78	94.76	0.67	d__Bacteria;p__Bacillota_A;c__Clostridia;o__Christensenellales;f__Christensenellaceae;g__;s__	0.0101193	0.0622941	0.0623421	0.00995093	0.028619	0.0299877	0.0115532	0.042683	0.02713	0.0128412	0.0302153	0.0304609
bin79	91.32	0.48	d__Bacteria;p__Bacteroidota;c__Bacteroidia;o__Bacteroidales;f__Muribaculaceae;g__Muribaculum;s__Muribaculum intestinale	0.496225	0.0376102	0.0599202	0.178882	0.0302036	0	0.221557	0.0120526	0.0099042	0.373983	0.0115152	0.0105929
bin80	96.26	2.88	d__Bacteria;p__Pseudomonadota;c__Gammaproteobacteria;o__Burkholderiales;f__Burkholderiaceae_B;g__Variovorax;s__Variovorax paradoxus_A	0.0454599	0.0915767	0.0555649	0.0188046	0.00831695	0.0459406	0.0481623	0.0662364	0.028123	0.0103836	0.0415612	0.0521232
bin81	96.89	3.93	d__Bacteria;p__Bacillota_A;c__Clostridia;o__Eubacteriales;f__Lachnospiraceae;g__Sporofaciens;s__Sporofaciens sp000403455	0.0107338	0.0955133	0.054804	0.0272861	0.46402	0.357996	0.118333	0.82683	0.38894	0.0149663	0.424953	0.213891
bin82	91.95	0	d__Bacteria;p__Bacillota_A;c__Clostridia;o__Oscillospirales;f__Ruminococcaceae;g__JAAVYW01;s__JAAVYW01 sp022791315	0.0113165	0.0124212	0.0536503	0.0255976	0.0399838	0.0263048	0.0270697	0.0272142	0.0231274	0.0786356	0.0337449	0.0237288
bin83	94.63	0	d__Bacteria;p__Bacillota_A;c__Clostridia;o__Oscillospirales;f__Butyricicoccaceae;g__Pseudobutyricicoccus;s__Pseudobutyricicoccus sp910579575	0	0.015285	0.052138	0	0.109817	0.062433	0.0207344	0.0776571	0.0825749	0	0.0974289	0.160076
bin84	94.97	2.33	d__Bacteria;p__Bacillota_A;c__Clostridia;o__Oscillospirales;f__Ruminococcaceae;g__UBA866;s__	0	0.00752837	0.0514193	0.00633603	0.12074	0.0750814	0	0.0751985	0.0717247	0.0164543	0.0618664	0.0389289
bin85	91.83	3.45	d__Bacteria;p__Bacteroidota;c__Bacteroidia;o__Bacteroidales;f__Muribaculaceae;g__Muribaculum;s__	0.0360196	0.0224772	0.0510386	0.0212851	0.00386357	0.00498744	0.0150082	0.00823905	0.0644085	0.0285424	0.00463229	0.0188476
bin86	90.3	0	d__Bacteria;p__Bacillota_A;c__Clostridia;o__Eubacteriales;f__Lachnospiraceae;g__Lachnoclostridium_B;s__Lachnoclostridium_B sp910588745	0.00600486	0.0289419	0.0508983	0.0120557	0.456299	0.610655	0.0305933	0.572855	0.337249	0.00838279	0.670548	0.349623
bin87	95.35	0.03	d__Bacteria;p__Pseudomonadota;c__Alphaproteobacteria;o__Rhizobiales;f__Xanthobacteraceae;g__Bradyrhizobium;s__	0.0512623	0.10646	0.0507007	0.0220127	0.102256	0.0596525	0.0607784	0.0871568	0.0391598	0.129594	0.0534423	0.0682547
bin88	91.92	1.72	d__Bacteria;p__Bacillota_A;c__Clostridia;o__Eubacteriales;f__Lachnospiraceae;g__1XD42-69;s__1XD42-69 sp910586725	0	0.0106089	0.0503216	0.0264661	0.0239965	0	0.0348619	0.0342247	0.0171332	0	0.130465	0.113036
bin89	95.97	0.67	d__Bacteria;p__Bacillota_A;c__Clostridia;o__Oscillospirales;f__Ruminococcaceae;g__Anaerotruncus;s__Anaerotruncus sp000403395	0.0105233	0.012409	0.0493109	0.0178383	0.0242588	0.0269561	0.0745118	0.0226023	0.0508	0.055142	0.00971579	0.00676251
bin90	93.69	1.68	d__Bacteria;p__Bacillota_A;c__Clostridia;o__Eubacteriales;f__Lachnospiraceae;g__UBA3282;s__UBA3282 sp910578645	0.00697854	0.0204954	0.0467452	0.0139442	0.0911524	0.0493362	0.022239	0.133093	0.0392737	0.0119284	0.0645488	0.0392119
bin91	97.4	1.61	d__Bacteria;p__Bacteroidota;c__Bacteroidia;o__Bacteroidales;f__Muribaculaceae;g__Duncaniella;s__Duncaniella sp001689575	0.881263	0.0176654	0.04525	0.656005	0.0110092	0.00552312	0.526609	0.0196206	0.0649743	0.603667	0.00868743	0.0220797
bin92	94.9	0	d__Bacteria;p__Bacillota_A;c__Clostridia;o__Eubacteriales;f__Lachnospiraceae;g__Roseburia;s__	0.00860973	0.0795837	0.0446371	0.0174897	0.161259	0.127986	0.0287587	0.374087	0.041551	0.0142323	0.198773	0.12549
bin93	97.12	0	d__Bacteria;p__Bacteroidota;c__Bacteroidia;o__Bacteroidales;f__Rikenellaceae;g__Alistipes;s__Alistipes sp910576555	0.0985708	0.0124901	0.0439036	0.0378371	1.38209	2.19172	0.045954	0.317772	1.2208	0.0791355	0.407475	0.775587
bin94	93.17	0.48	d__Bacteria;p__Bacillota_A;c__Clostridia;o__Eubacteriales;f__Lachnospiraceae;g__UBA7109;s__UBA7109 sp910575605	0.0048905	0.0150198	0.0423643	0.0179197	0.125145	0.141542	0.0216325	0.241293	0.0827979	0.00881975	0.158731	0.0485773
bin95	94.4	2.01	d__Bacteria;p__Bacteroidota;c__Bacteroidia;o__Bacteroidales;f__Muribaculaceae;g__Muribaculum;s__Muribaculum sp002473395	0.0787593	0.0295374	0.0421524	0.0233266	0.0176411	0.0254635	0	0.0274713	0.0668264	0.026635	0.0163678	0.0481485
bin96	90.29	0.67	d__Bacteria;p__Bacillota_A;c__Clostridia;o__Eubacteriales;f__Lachnospiraceae;g__Acetatifactor;s__	0	0.00493518	0.0414017	0	1.68279	1.4959	0.0209951	0.81738	0.364964	0.0107772	0.61505	1.29612
bin97	100	0	d__Bacteria;p__Bacteroidota;c__Bacteroidia;o__Chitinophagales;f__Chitinophagaceae;g__Sediminibacterium;s__	0.0331875	0.0551723	0.0404282	0.0158642	0	0.0375746	0.0267671	0.0398149	0.0176749	0.00490645	0.0295253	0.0284718
bin98	92.13	0	d__Bacteria;p__Bacillota;c__Bacilli;o__RF39;f__UBA660;g__CAG-582;s__	0.016308	0.00461704	0.0399751	0.0423341	0.0946435	0.0832803	0	0	0	0.0232534	0	0.0618853
bin99	100	1.85	d__Bacteria;p__Bacillota;c__Bacilli;o__Erysipelotrichales;f__Coprobacillaceae;g__Thomasclavelia;s__Thomasclavelia cocleata	0.0174729	0.0273014	0.0398224	0.0275727	0.676454	1.6144	0.0134978	0.497847	0.39837	0.00918302	0.889992	0.174092
bin100	91.61	0	d__Bacteria;p__Bacillota_A;c__Clostridia;o__Oscillospirales;f__Oscillospiraceae;g__HGM13010;s__HGM13010 sp022800755	0.0544047	0.026304	0.0389646	0.0593976	0.0382143	0.0285592	0.0805489	0.0221117	0.0182564	0.0852938	0.0299656	0.0294273
bin101	93.15	1.68	d__Bacteria;p__Bacillota_A;c__Clostridia;o__Christensenellales;f__Borkfalkiaceae;g__Coproplasma;s__Coproplasma sp910583545	0.0460589	0	0.0368393	0.0107879	0	0	0.252499	0	0	0.059145	0	0
bin102	93.19	0	d__Bacteria;p__Bacteroidota;c__Bacteroidia;o__Bacteroidales;f__Muribaculaceae;g__UBA7173;s__UBA7173 sp002491305	0.230683	0.0403627	0.0366823	0.160281	0	0	0.197081	0	0	0.18676	0	0
bin103	91.72	1.58	d__Bacteria;p__Bacillota_A;c__Clostridia;o__Oscillospirales;f__Acutalibacteraceae;g__Avimonas_A;s__Avimonas_A sp022800315	0.0115571	0.0263968	0.0354049	0.00559793	0.0369321	0.0237181	0	0.0351468	0.0326723	0.00608644	0.0429503	0.0339389
bin104	95.16	5.5	d__Bacteria;p__Actinomycetota;c__Coriobacteriia;o__Coriobacteriales;f__Eggerthellaceae;g__MGBC163016;s__MGBC163016 sp910588945	0.021847	0.0475284	0.0348822	0.0330667	0.0222923	0.0370769	0.025832	0.0401784	0.0233748	0.031335	0.0309617	0.0349096
bin105	99.37	6.23	d__Bacteria;p__Pseudomonadota;c__Alphaproteobacteria;o__Rhizobiales;f__Xanthobacteraceae;g__Afipia;s__	0.0189354	0.0375022	0.0339644	0.00686425	0.0246132	0.0272023	0.0163721	0.0300849	0.0155926	0.0234022	0.0210323	0.0250959
bin106	96.79	6.59	d__Bacteria;p__Bacteroidota;c__Bacteroidia;o__Bacteroidales;f__Muribaculaceae;g__UBA7173;s__UBA7173 sp013316675	0.451834	0.0595446	0.0329887	0.28567	0.00646696	0.00632203	0.254935	0.0105191	0.0216619	0.477875	0.00598905	0.0191755
bin107	99.3	0.45	d__Bacteria;p__Bacillota_A;c__Clostridia;o__Peptostreptococcales;f__Peptostreptococcaceae;g__Romboutsia;s__Romboutsia ilealis	0	0.0381503	0.0326983	0	0.225671	0.350041	0	0.741019	1.44339	0	0.307791	1.53438
bin108	92.43	0.13	d__Bacteria;p__Bacillota_A;c__Clostridia;o__Eubacteriales;f__Lachnospiraceae;g__14-2;s__14-2 sp000403255	0.00928117	0.0778753	0.0312613	0.0245082	0.0181873	0.170441	0.0395194	0.129832	0.132866	0.022823	0.0521773	0.0259104
bin109	94.85	2.68	d__Bacteria;p__Bacillota_A;c__Clostridia;o__Eubacteriales;f__Lachnospiraceae;g__UBA3282;s__UBA3282 sp003611805	0.023351	0	0.0306392	0.39481	0	0	0.154347	0	0	0.228982	0	0
bin110	91.94	1.34	d__Bacteria;p__Bacillota_A;c__Clostridia;o__Christensenellales;f__Borkfalkiaceae;g__Gallimonas;s__Gallimonas sp910588465	0.00514772	0.0027131	0.0299432	0	0.00736394	0.00818656	0.0408906	0.00715677	0.296316	0.00677419	0.00698694	0.0458567
bin111	91.16	1.54	d__Bacteria;p__Bacillota_A;c__Clostridia;o__Oscillospirales;f__UBA644;g__;s__	0.0354005	0.00922167	0.0278452	0.0528675	0.0139109	0.0146414	0.0715053	0.0183788	0	0.056115	0.0130626	0
bin112	93.39	2.01	d__Bacteria;p__Bacillota_A;c__Clostridia;o__Eubacteriales;f__Lachnospiraceae;g__CAG-510;s__CAG-510 sp003979355	0.133567	0	0.0275902	0.520431	0.0430032	0.0678906	0.226633	0	0	0.137598	0	0
bin113	90.44	1.72	d__Bacteria;p__Bacteroidota;c__Bacteroidia;o__Bacteroidales;f__Muribaculaceae;g__CAG-873;s__	0.16033	0.031141	0.0259068	0.241024	0	0	0.159675	0.0111837	0	0.254805	0	0
bin114	94.76	0.38	d__Bacteria;p__Bacillota_A;c__Clostridia;o__Christensenellales;f__Christensenellaceae;g__QANA01;s__QANA01 sp910588425	0.0310996	0.00923037	0.0257799	0.0468169	0.0260764	0.0147327	0.0369716	0.036931	0.0274621	0.0674543	0.0317501	0.0250755
bin115	95.15	4.32	d__Bacteria;p__Bacillota_A;c__Clostridia;o__Eubacteriales;f__Eubacteriaceae;g__Eubacterium_J;s__Eubacterium_J sp910577225	0.0169747	0.0100874	0.0241522	0.034713	0	0	0.516348	0	0	0.0366207	0	0
bin116	95.64	1.66	d__Bacteria;p__Bacillota_A;c__Clostridia;o__Oscillospirales;f__Ruminococcaceae;g__UBA866;s__UBA866 sp022791945	0.00470618	0.0101709	0.0237156	0.00817508	0.103119	0.0788985	0.00950428	0.095529	0.0586813	0.016709	0.178613	0.0940114
bin117	95.53	0.34	d__Bacteria;p__Bacillota_A;c__Clostridia;o__Eubacteriales;f__Lachnospiraceae;g__1XD42-69;s__1XD42-69 sp003612565	0.112244	0	0.0229078	0.100072	0	0	0.630188	0	0	0.195291	0	0
bin118	98.85	0.67	d__Bacteria;p__Bacillota_A;c__Clostridia;o__Eubacteriales;f__Lachnospiraceae;g__UBA3282;s__UBA3282 sp910579735	0.0409753	0	0.0225871	0.546678	0.0356173	0.162867	0.266695	0.0239021	0.0200016	0.0591129	0.0348724	0.0476471
bin119	98.39	3.85	d__Bacteria;p__Actinomycetota;c__Coriobacteriia;o__Coriobacteriales;f__Eggerthellaceae;g__MGBC163016;s__MGBC163016 sp910588205	0.15961	0.00824683	0.0215429	0.177127	0	0	0.109426	0	0	0.138889	0	0
bin120	95.56	1.17	d__Bacteria;p__Bacillota_A;c__Clostridia;o__Christensenellales;f__Pumilibacteraceae;g__Pumilibacter;s__Pumilibacter sp910579245	0.00535989	0.00476804	0.0213088	0.00541215	0.0105087	0.0262197	0.0126634	0.00754542	0.17928	0.0111204	0.0126408	0.060098
bin121	99.06	1.33	d__Bacteria;p__Bacteroidota;c__Bacteroidia;o__Bacteroidales;f__Muribaculaceae;g__Duncaniella;s__Duncaniella sp910589485	0.788745	0.00986219	0.0200039	0.385949	0	0	0.400765	0	0	0.652048	0	0
bin122	94.95	1.13	d__Bacteria;p__Bacteroidota;c__Bacteroidia;o__Bacteroidales;f__Rikenellaceae;g__Alistipes;s__Alistipes sp910587675	0.0736378	0.0047825	0.019833	0.0488261	0.0410916	0.0722171	0.0411505	0.0478964	0.0788294	0.070673	0.0277243	0.0910645
bin123	90.6	1.45	d__Bacteria;p__Bacillota_A;c__Clostridia;o__Oscillospirales;f__Ruminococcaceae;g__RGIG7389;s__	0	0.00487748	0.0197118	0	0.0701057	0.0713795	0	0.0498709	0.0736647	0	0.0567114	0.0289531
bin124	94.43	0.85	d__Bacteria;p__Bacillota_A;c__Clostridia;o__Eubacteriales;f__Lachnospiraceae;g__UBA3282;s__UBA3282 sp009774215	0.0735829	0	0.019385	0.139922	0	0	0.960368	0	0	0.15076	0	0
bin125	95.04	4.83	d__Bacteria;p__Bacillota_A;c__Clostridia;o__Eubacteriales;f__Lachnospiraceae;g__Paralachnospira_A;s__	0	0.011126	0.0187225	0	0.137911	0.136094	0.0267702	0.0550909	0.0369748	0.0144494	0.0550548	0.0617928
bin126	97.92	0.94	d__Bacteria;p__Bacteroidota;c__Bacteroidia;o__Bacteroidales;f__Muribaculaceae;g__Duncaniella;s__Duncaniella muris	1.89002	0.0204591	0.017453	1.39423	0.0113673	0.0252498	1.45481	0.0212621	0.0891496	1.88013	0.0139734	0.13664
bin127	93.66	0	d__Bacteria;p__Bacillota_A;c__Clostridia;o__Eubacteriales;f__Lachnospiraceae;g__RGIG7193;s__RGIG7193 sp022791755	0	0	0.0166018	0	0.184157	0.0651338	0.0118214	0.0789575	0.0299295	0	0.0684219	0.0947617
bin128	93.82	0.57	d__Bacteria;p__Bacillota;c__Bacilli;o__RF39;f__UBA660;g__MGBC107952;s__	0.028113	0	0.0154883	0.0295752	0.0306538	0.0896724	0.0287244	0.42673	0.0898779	0.0274506	0.127995	0.025291
bin129	96.49	1.34	d__Bacteria;p__Bacillota_A;c__Clostridia;o__Eubacteriales;f__Lachnospiraceae;g__CAG-317;s__CAG-317 sp011960265	0.00987824	0.00816953	0.0149698	0.0286783	0.387157	3.59633	0.027139	1.99584	1.80154	0.0347995	0.686439	0.0242775
bin130	92.82	0.11	d__Bacteria;p__Actinomycetota;c__Actinomycetia;o__Mycobacteriales;f__Mycobacteriaceae;g__Mycobacterium;s__Mycobacterium aubagnense	0.00877205	0.0535228	0.0124183	0.0130695	0.0871608	0.0130757	0.0382248	0.0404123	0.0158569	0.120744	0.0193518	0.0344385
bin131	91.21	0.02	d__Bacteria;p__Bacillota_A;c__Clostridia;o__Eubacteriales;f__Lachnospiraceae;g__Roseburia;s__Roseburia sp910587865	0	0	0.0120489	0	0.0733363	0.208311	0.0316425	0.0420991	0.0337755	0.0134687	0.0490421	0.0325418
bin132	93.95	0	d__Bacteria;p__Bacillota_A;c__Clostridia;o__Christensenellales;f__Borkfalkiaceae;g__Coproplasma;s__Coproplasma sp910585705	0.143274	0	0.0117914	0.0422305	0	0	0.147048	0	0	0.088873	0	0
bin133	95.41	4.32	d__Bacteria;p__Bacillota_A;c__Clostridia;o__Eubacteriales;f__Lachnospiraceae;g__Caccovicinus;s__Caccovicinus sp910585635	0.0291232	0	0.0105314	0.096628	0	0	0.0861152	0	0	0.0986539	0	0
bin134	91.57	1.33	d__Bacteria;p__Bacillota;c__Bacilli;o__RF39;f__UBA660;g__RUG11867;s__	0.038643	0	0.0102014	0.0626337	0	0	0.0596162	0	0	0.0800899	0	0
bin135	97.86	0.03	d__Bacteria;p__Bacteroidota;c__Bacteroidia;o__Bacteroidales;f__Muribaculaceae;g__UBA7173;s__UBA7173 sp910587075	0.33671	0.0318483	0.0094861	0.276676	0.0056846	0	0.193267	0.0180993	0.0348124	0.300655	0.00597633	0.0308639
bin136	94.76	4.14	d__Bacteria;p__Bacillota_A;c__Clostridia;o__Christensenellales;f__Borkfalkiaceae;g__Gallimonas;s__Gallimonas sp910586985	0.00775281	0	0.00853489	0.00526736	0.0168397	0.0123058	0.0782092	0.0242086	0.0659224	0.00309329	0.026113	0.0366121
bin137	98.66	1.71	d__Bacteria;p__Bacillota_A;c__Clostridia;o__Oscillospirales;f__Acutalibacteraceae;g__Acutalibacter;s__Acutalibacter sp910589395	0.253727	0	0.00788472	0.129595	0	0	0.0510542	0	0	0.130635	0	0
bin138	99.05	1.68	d__Bacteria;p__Bacillota;c__Bacilli;o__Erysipelotrichales;f__Erysipelotrichaceae;g__;s__	0.0789707	0	0.00460236	0.0778989	0.00725531	0.012372	0.034695	0.0156856	0.0107118	0.0724776	0.00917639	0.00572215
bin139	100	0.34	d__Bacteria;p__Actinomycetota;c__Coriobacteriia;o__Coriobacteriales;f__Eggerthellaceae;g__D16-34;s__D16-34 sp003612515	0.0803456	0.00794855	0.00414735	0.123792	0.0337633	0.00423636	0.093539	0.0254442	0	0.0803967	0.0177942	0
bin140	94.4	0	d__Bacteria;p__Bacteroidota;c__Bacteroidia;o__Bacteroidales;f__Muribaculaceae;g__CAG-485;s__CAG-485 sp002493045	1.82647	0.0375328	0	0.607862	0	0	0.753254	0	0	1.42009	0	0
bin141	98.66	0	d__Bacteria;p__Bacillota_A;c__Clostridia;o__Eubacteriales;f__Lachnospiraceae;g__Wujia;s__Wujia sp002493625	0.151713	0	0	1.16832	0	0	0.138489	0	0	0.426651	0	0
bin142	91.28	1.17	d__Bacteria;p__Bacillota_A;c__Clostridia;o__Eubacteriales;f__Eubacteriaceae;g__Eubacterium_F;s__Eubacterium_F sp910584875	0.126496	0	0	0.0797257	0	0	0.119491	0	0	0.0871975	0	0
bin143	95.97	1.82	d__Bacteria;p__Bacillota_A;c__Clostridia;o__Oscillospirales;f__Ruminococcaceae;g__Ruminiclostridium_E;s__Ruminiclostridium_E sp910579265	0.0716564	0	0	0.0448144	0	0	0.0186506	0	0	0.35752	0	0
bin144	91.34	1.93	d__Bacteria;p__Bacteroidota;c__Bacteroidia;o__Bacteroidales;f__Muribaculaceae;g__CAG-873;s__CAG-873 sp910587915	0.0663016	0	0	0.056129	0	0	0.0374631	0	0	0.0728082	0	0
bin145	90.27	0.81	d__Bacteria;p__Bacillota_A;c__Clostridia;o__Eubacteriales;f__Lachnospiraceae;g__CAG-603;s__CAG-603 sp910583605	0.0602423	0	0	0.0839966	0	0	0.0690522	0	0	0.0550069	0	0
bin146	96.77	1.44	d__Bacteria;p__Actinomycetota;c__Coriobacteriia;o__Coriobacteriales;f__Eggerthellaceae;g__D16-63;s__	0.0330459	0	0	0.0693641	0	0	0.173472	0	0	0.0523237	0	0
bin147	97.99	0.84	d__Bacteria;p__Bacillota_A;c__Clostridia;o__UBA1381;f__UBA1381;g__;s__	0.0182537	0	0	0.191733	0	0	0.0529981	0	0	0.0463086	0	0
bin148	95.64	1.29	d__Bacteria;p__Bacillota_A;c__Clostridia;o__Eubacteriales;f__Eubacteriaceae;g__Eubacterium_F;s__Eubacterium_F sp910585745	0.0174058	0	0	0.126055	0	0	0.169088	0	0	0.220859	0	0
bin149	98.32	2.89	d__Bacteria;p__Bacillota_A;c__Clostridia;o__Eubacteriales;f__Eubacteriaceae;g__Eubacterium_G;s__Eubacterium_G sp910584795	0	0.00588785	0	0.129694	0.0310132	0.0369854	0.111206	0.0767064	0.0408813	0.08203	0.0300563	0.0462911
bin150	99.06	1.28	d__Bacteria;p__Bacillota;c__Bacilli;o__Lactobacillales;f__Lactobacillaceae;g__Levilactobacillus;s__Levilactobacillus brevis	0	0	0	0	0	0	0	0.0386142	0.20327	0	0.0653287	0.571204
