# Supplementary material for: Probiotic interventions with highly acid-tolerant Levilactobacillus brevis strains improve lipid metabolism and gut microbial balance in obese mice
Source: Royal Society of Chemistry journal article supplement (doi:10.1039/d4fo03417a), 2024-12-02
Supplement: d4fo03417a3.xlsx [file d4fo03417a3.xlsx]

## Sheet: Sheet1
The ANIb (Average Nucleotide Identity) table for the comparison of the reconstructed Lactobacillus brevis and the gavaged Lactobacillus brevis's whole genome and all Lactobacillus brevis genomes on NCBI.
Lactobacillus brevis assembly sequence	D17 genome and Lactobacillus brevis genome on NCBI	ANIb
bin150.fna	D17.fna	99.9826
bin150.fna	GCA_025194305.1_ASM2519430v1_genomic.fna	99.6695
bin150.fna	GCF_025194305.1_ASM2519430v1_genomic.fna	99.6695
bin150.fna	GCA_025122425.1_ASM2512242v1_genomic.fna	99.6694
bin150.fna	GCF_025122425.1_ASM2512242v1_genomic.fna	99.6694
bin150.fna	GCF_013249075.1_ASM1324907v1_genomic.fna	99.6684
bin150.fna	GCA_013249075.1_ASM1324907v1_genomic.fna	99.6684
bin150.fna	GCF_009741845.1_ASM974184v1_genomic.fna	99.6312
bin150.fna	GCA_009741845.1_ASM974184v1_genomic.fna	99.6312
bin150.fna	GCA_925279105.1_IM1470_genomic.fna	99.6305
bin150.fna	GCF_925279105.1_IM1470_genomic.fna	99.6305
bin150.fna	GCF_024800685.1_ASM2480068v1_genomic.fna	99.6174
bin150.fna	GCA_024800685.1_ASM2480068v1_genomic.fna	99.6174
bin150.fna	GCF_026410225.1_ASM2641022v1_genomic.fna	99.5415
bin150.fna	GCA_026410225.1_ASM2641022v1_genomic.fna	99.5415
bin150.fna	GCA_020532035.1_ASM2053203v1_genomic.fna	99.5295
bin150.fna	GCF_020532035.1_ASM2053203v1_genomic.fna	99.5295
bin150.fna	GCA_004055405.1_ASM405540v1_genomic.fna	99.4103
bin150.fna	GCF_004055405.1_ASM405540v1_genomic.fna	99.4103
bin150.fna	GCF_000526755.1_ASM52675v1_genomic.fna	99.3755
bin150.fna	GCA_000526755.1_ASM52675v1_genomic.fna	99.3755
bin150.fna	GCA_002017995.1_ASM201799v1_genomic.fna	99.3317
bin150.fna	GCF_002017995.1_ASM201799v1_genomic.fna	99.3317
bin150.fna	GCA_025000005.1_ASM2500000v1_genomic.fna	99.3305
bin150.fna	GCF_025000005.1_ASM2500000v1_genomic.fna	99.3305
bin150.fna	GCF_006228245.1_ASM622824v1_genomic.fna	99.3272
bin150.fna	GCA_006228245.1_ASM622824v1_genomic.fna	99.3272
bin150.fna	GCA_006539265.1_ASM653926v1_genomic.fna	99.3189
bin150.fna	GCF_006539265.1_ASM653926v1_genomic.fna	99.3189
bin150.fna	GCF_000014465.1_ASM1446v1_genomic.fna	99.317
bin150.fna	GCA_000014465.1_ASM1446v1_genomic.fna	99.317
bin150.fna	GCA_020509325.1_ASM2050932v1_genomic.fna	99.3086
bin150.fna	GCF_020509325.1_ASM2050932v1_genomic.fna	99.3086
bin150.fna	GCF_030361165.1_ASM3036116v1_genomic.fna	99.3043
bin150.fna	GCA_030361165.1_ASM3036116v1_genomic.fna	99.3043
bin150.fna	GCF_030361325.1_ASM3036132v1_genomic.fna	99.298
bin150.fna	GCA_030361325.1_ASM3036132v1_genomic.fna	99.298
bin150.fna	GCF_025194505.1_ASM2519450v1_genomic.fna	99.2958
bin150.fna	GCA_025194505.1_ASM2519450v1_genomic.fna	99.2958
bin150.fna	GCF_006381875.1_ASM638187v1_genomic.fna	99.2955
bin150.fna	GCA_006381875.1_ASM638187v1_genomic.fna	99.2955
bin150.fna	GCA_006228305.1_ASM622830v1_genomic.fna	99.2936
bin150.fna	GCF_006228305.1_ASM622830v1_genomic.fna	99.2936
bin150.fna	GCA_002138395.1_ASM213839v1_genomic.fna	99.2883
bin150.fna	GCF_002138395.1_ASM213839v1_genomic.fna	99.2883
bin150.fna	GCA_018916925.1_ASM1891692v1_genomic.fna	99.2838
bin150.fna	GCF_018916925.1_ASM1891692v1_genomic.fna	99.2838
bin150.fna	GCA_006538905.1_ASM653890v1_genomic.fna	99.2821
bin150.fna	GCF_006538905.1_ASM653890v1_genomic.fna	99.2821
bin150.fna	GCA_025194485.1_ASM2519448v1_genomic.fna	99.2793
bin150.fna	GCF_025194485.1_ASM2519448v1_genomic.fna	99.2793
bin150.fna	GCA_006228225.1_ASM622822v1_genomic.fna	99.2783
bin150.fna	GCF_006228225.1_ASM622822v1_genomic.fna	99.2783
bin150.fna	GCA_025186345.1_ASM2518634v1_genomic.fna	99.2694
bin150.fna	GCF_025186345.1_ASM2518634v1_genomic.fna	99.2694
bin150.fna	GCF_023743515.1_ASM2374351v1_genomic.fna	99.2691
bin150.fna	GCA_023743515.1_ASM2374351v1_genomic.fna	99.2691
bin150.fna	GCF_023744095.1_ASM2374409v1_genomic.fna	99.262
bin150.fna	GCA_023744095.1_ASM2374409v1_genomic.fna	99.262
bin150.fna	GCF_023743375.1_ASM2374337v1_genomic.fna	99.2619
bin150.fna	GCA_023743375.1_ASM2374337v1_genomic.fna	99.2619
bin150.fna	GCA_014905055.1_ASM1490505v1_genomic.fna	99.2585
bin150.fna	GCF_014905055.1_ASM1490505v1_genomic.fna	99.2585
bin150.fna	GCF_000359625.1_ASM35962v1_genomic.fna	99.2577
bin150.fna	GCA_000359625.1_ASM35962v1_genomic.fna	99.2577
bin150.fna	GCA_023743355.1_ASM2374335v1_genomic.fna	99.2513
bin150.fna	GCF_023743355.1_ASM2374335v1_genomic.fna	99.2513
bin150.fna	GCA_023743475.1_ASM2374347v1_genomic.fna	99.2507
bin150.fna	GCF_023743475.1_ASM2374347v1_genomic.fna	99.2507
bin150.fna	GCF_000784455.1_ASM78445v1_genomic.fna	99.2489
bin150.fna	GCA_000784455.1_ASM78445v1_genomic.fna	99.2489
bin150.fna	GCF_023744005.1_ASM2374400v1_genomic.fna	99.2485
bin150.fna	GCA_023744005.1_ASM2374400v1_genomic.fna	99.2485
bin150.fna	GCF_022350025.1_ASM2235002v1_genomic.fna	99.2478
bin150.fna	GCA_022350025.1_ASM2235002v1_genomic.fna	99.2478
bin150.fna	GCA_001541605.1_1153_genomic.fna	99.2475
bin150.fna	GCF_001541605.1_1153_genomic.fna	99.2475
bin150.fna	GCA_001540905.1_ASM154090v1_genomic.fna	99.246
bin150.fna	GCF_001540905.1_ASM154090v1_genomic.fna	99.246
bin150.fna	GCF_023743495.1_ASM2374349v1_genomic.fna	99.2443
bin150.fna	GCA_023743495.1_ASM2374349v1_genomic.fna	99.2443
bin150.fna	GCA_003345725.1_ASM334572v1_genomic.fna	99.2393
bin150.fna	GCF_003345725.1_ASM334572v1_genomic.fna	99.2393
bin150.fna	GCF_023744105.1_ASM2374410v1_genomic.fna	99.2388
bin150.fna	GCA_023744105.1_ASM2374410v1_genomic.fna	99.2388
bin150.fna	GCA_023744425.1_ASM2374442v1_genomic.fna	99.2371
bin150.fna	GCF_023744425.1_ASM2374442v1_genomic.fna	99.2371
bin150.fna	GCA_025194515.1_ASM2519451v1_genomic.fna	99.2359
bin150.fna	GCF_025194515.1_ASM2519451v1_genomic.fna	99.2359
bin150.fna	GCA_003346245.1_ASM334624v1_genomic.fna	99.2336
bin150.fna	GCF_003346245.1_ASM334624v1_genomic.fna	99.2336
bin150.fna	GCF_002173555.1_ASM217355v1_genomic.fna	99.2285
bin150.fna	GCA_002173555.1_ASM217355v1_genomic.fna	99.2285
bin150.fna	GCF_032841255.1_ASM3284125v1_genomic.fna	99.227
bin150.fna	GCA_032841255.1_ASM3284125v1_genomic.fna	99.227
bin150.fna	GCF_018798865.1_ASM1879886v1_genomic.fna	99.2238
bin150.fna	GCA_018798865.1_ASM1879886v1_genomic.fna	99.2238
bin150.fna	GCA_023744455.1_ASM2374445v1_genomic.fna	99.2212
bin150.fna	GCF_023744455.1_ASM2374445v1_genomic.fna	99.2212
bin150.fna	GCF_025194545.1_ASM2519454v1_genomic.fna	99.2208
bin150.fna	GCA_025194545.1_ASM2519454v1_genomic.fna	99.2208
bin150.fna	GCA_003060705.1_ASM306070v1_genomic.fna	99.2178
bin150.fna	GCF_003060705.1_ASM306070v1_genomic.fna	99.2178
bin150.fna	GCA_032841235.1_ASM3284123v1_genomic.fna	99.2136
bin150.fna	GCF_032841235.1_ASM3284123v1_genomic.fna	99.2136
bin150.fna	GCA_026622905.1_ASM2662290v1_genomic.fna	99.2103
bin150.fna	GCA_019693335.1_ASM1969333v1_genomic.fna	99.1942
bin150.fna	GCF_019693335.1_ASM1969333v1_genomic.fna	99.1942
bin150.fna	GCA_002174235.1_ASM217423v1_genomic.fna	99.1883
bin150.fna	GCF_002174235.1_ASM217423v1_genomic.fna	99.1883
bin150.fna	GCA_003053125.1_ASM305312v1_genomic.fna	99.1784
bin150.fna	GCF_003053125.1_ASM305312v1_genomic.fna	99.1784
bin150.fna	GCF_030378305.1_ASM3037830v1_genomic.fna	99.175
bin150.fna	GCA_030378305.1_ASM3037830v1_genomic.fna	99.175
bin150.fna	GCA_015238595.1_ASM1523859v1_genomic.fna	99.1218
bin150.fna	GCF_015238595.1_ASM1523859v1_genomic.fna	99.1218
bin150.fna	GCA_026639055.1_ASM2663905v1_genomic.fna	99.114
bin150.fna	GCF_026639055.1_ASM2663905v1_genomic.fna	99.114
bin150.fna	GCF_025194405.1_ASM2519440v1_genomic.fna	99.0959
bin150.fna	GCA_025194405.1_ASM2519440v1_genomic.fna	99.0959
bin150.fna	GCF_001010995.1_ASM101099v1_genomic.fna	99.0822
bin150.fna	GCA_001010995.1_ASM101099v1_genomic.fna	99.0822
bin150.fna	GCF_902386565.1_UHGG_MGYG-HGUT-02380_genomic.fna	99.0822
bin150.fna	GCA_902386565.1_UHGG_MGYG-HGUT-02380_genomic.fna	99.0822
bin150.fna	GCA_028411555.1_ASM2841155v1_genomic.fna	99.0708
bin150.fna	GCF_025194385.1_ASM2519438v1_genomic.fna	99.0521
bin150.fna	GCA_025194385.1_ASM2519438v1_genomic.fna	99.0521
bin150.fna	GCA_026626025.1_ASM2662602v1_genomic.fna	99.0077
bin150.fna	GCF_026626025.1_ASM2662602v1_genomic.fna	99.0077
bin150.fna	GCA_024330045.1_ASM2433004v1_genomic.fna	98.5378
bin150.fna	GCF_024330045.1_ASM2433004v1_genomic.fna	98.5378
bin150.fna	GCF_026930425.1_ASM2693042v1_genomic.fna	98.413
bin150.fna	GCA_026930425.1_ASM2693042v1_genomic.fna	98.413
bin150.fna	GCF_925285815.1_IM1293_genomic.fna	98.4068
bin150.fna	GCA_925285815.1_IM1293_genomic.fna	98.4068
bin150.fna	GCF_002532245.1_ASM253224v1_genomic.fna	98.4067
bin150.fna	GCA_002532245.1_ASM253224v1_genomic.fna	98.4067
bin150.fna	GCF_026930445.1_ASM2693044v1_genomic.fna	98.4056
bin150.fna	GCA_026930445.1_ASM2693044v1_genomic.fna	98.4056
bin150.fna	GCA_003346095.1_ASM334609v1_genomic.fna	98.4011
bin150.fna	GCF_003346095.1_ASM334609v1_genomic.fna	98.4011
bin150.fna	GCF_002532155.1_ASM253215v1_genomic.fna	98.3956
bin150.fna	GCA_002532155.1_ASM253215v1_genomic.fna	98.3956
bin150.fna	GCA_027108875.1_ASM2710887v1_genomic.fna	98.3939
bin150.fna	GCF_027108875.1_ASM2710887v1_genomic.fna	98.3939
bin150.fna	GCF_026930365.1_ASM2693036v1_genomic.fna	98.3903
bin150.fna	GCA_026930365.1_ASM2693036v1_genomic.fna	98.3903
bin150.fna	GCA_018784425.1_ASM1878442v1_genomic.fna	98.3723
bin150.fna	GCF_018784425.1_ASM1878442v1_genomic.fna	98.3723
bin150.fna	GCF_025194465.1_ASM2519446v1_genomic.fna	98.3065
bin150.fna	GCA_025194465.1_ASM2519446v1_genomic.fna	98.3065
bin150.fna	GCA_006538845.1_ASM653884v1_genomic.fna	98.3015
bin150.fna	GCF_006538845.1_ASM653884v1_genomic.fna	98.3015
bin150.fna	GCF_021384555.1_ASM2138455v1_genomic.fna	98.2363
bin150.fna	GCA_021384555.1_ASM2138455v1_genomic.fna	98.2363
bin150.fna	GCA_021384405.1_ASM2138440v1_genomic.fna	98.2331
bin150.fna	GCF_021384405.1_ASM2138440v1_genomic.fna	98.2331
bin150.fna	GCF_021384515.1_ASM2138451v1_genomic.fna	98.2223
bin150.fna	GCA_021384505.1_ASM2138450v1_genomic.fna	98.2219
bin150.fna	GCF_021384505.1_ASM2138450v1_genomic.fna	98.2219
bin150.fna	GCA_021384395.1_ASM2138439v1_genomic.fna	98.2209
bin150.fna	GCF_021384395.1_ASM2138439v1_genomic.fna	98.2209
bin150.fna	GCF_018991505.1_ASM1899150v1_genomic.fna	98.2191
bin150.fna	GCA_018991505.1_ASM1899150v1_genomic.fna	98.2191
bin150.fna	GCA_018991675.1_ASM1899167v1_genomic.fna	98.2128
bin150.fna	GCF_018991675.1_ASM1899167v1_genomic.fna	98.2128
bin150.fna	GCF_021384495.1_ASM2138449v1_genomic.fna	98.2117
bin150.fna	GCA_018993685.1_ASM1899368v1_genomic.fna	98.201
bin150.fna	GCF_018993685.1_ASM1899368v1_genomic.fna	98.201
bin150.fna	GCA_021384615.1_ASM2138461v1_genomic.fna	98.1978
bin150.fna	GCF_021384615.1_ASM2138461v1_genomic.fna	98.1978
bin150.fna	GCF_021384445.1_ASM2138444v1_genomic.fna	98.1973
bin150.fna	GCA_021384445.1_ASM2138444v1_genomic.fna	98.1973
bin150.fna	GCF_021384565.1_ASM2138456v1_genomic.fna	98.1953
bin150.fna	GCA_021384565.1_ASM2138456v1_genomic.fna	98.1953
bin150.fna	GCF_021384415.1_ASM2138441v1_genomic.fna	98.1934
bin150.fna	GCA_021384415.1_ASM2138441v1_genomic.fna	98.1934
bin150.fna	GCA_021384595.1_ASM2138459v1_genomic.fna	98.188
bin150.fna	GCF_021384595.1_ASM2138459v1_genomic.fna	98.188
bin150.fna	GCA_025447255.1_ASM2544725v1_genomic.fna	97.8682
bin150.fna	GCF_025447255.1_ASM2544725v1_genomic.fna	97.8682
bin150.fna	GCA_023744035.1_ASM2374403v1_genomic.fna	97.8568
bin150.fna	GCF_023744035.1_ASM2374403v1_genomic.fna	97.8568
bin150.fna	GCF_025194325.1_ASM2519432v1_genomic.fna	97.8086
bin150.fna	GCA_025194325.1_ASM2519432v1_genomic.fna	97.8086
bin150.fna	GCA_963534875.1_DRR247351_bin.2_MetaWRAP_v1.3_MAG_genomic.fna	97.7916
bin150.fna	GCA_002318935.1_ASM231893v1_genomic.fna	97.7765
bin150.fna	GCF_002318935.1_ASM231893v1_genomic.fna	97.7765
bin150.fna	GCF_027698385.1_ASM2769838v1_genomic.fna	97.7749
bin150.fna	GCA_027698385.1_ASM2769838v1_genomic.fna	97.7749
bin150.fna	GCA_027698185.1_ASM2769818v1_genomic.fna	97.7684
bin150.fna	GCF_027698185.1_ASM2769818v1_genomic.fna	97.7684
bin150.fna	GCF_027664805.1_ASM2766480v1_genomic.fna	97.7647
bin150.fna	GCA_027664805.1_ASM2766480v1_genomic.fna	97.7647
bin150.fna	GCF_027698855.1_ASM2769885v1_genomic.fna	97.758
bin150.fna	GCA_027698855.1_ASM2769885v1_genomic.fna	97.758
bin150.fna	GCF_001676805.1_ASM167680v1_genomic.fna	97.7577
bin150.fna	GCA_001676805.1_ASM167680v1_genomic.fna	97.7577
bin150.fna	GCF_003813165.1_ASM381316v1_genomic.fna	97.757
bin150.fna	GCA_003813165.1_ASM381316v1_genomic.fna	97.757
bin150.fna	GCF_027698985.1_ASM2769898v1_genomic.fna	97.7563
bin150.fna	GCA_027698985.1_ASM2769898v1_genomic.fna	97.7563
bin150.fna	GCF_027686645.1_ASM2768664v1_genomic.fna	97.7542
bin150.fna	GCA_027686645.1_ASM2768664v1_genomic.fna	97.7542
bin150.fna	GCA_027692245.1_ASM2769224v1_genomic.fna	97.7462
bin150.fna	GCF_027692245.1_ASM2769224v1_genomic.fna	97.7462
bin150.fna	GCF_001953605.1_ASM195360v1_genomic.fna	97.7446
bin150.fna	GCA_001953605.1_ASM195360v1_genomic.fna	97.7446
bin150.fna	GCA_000474675.1_Lactobacillus_brevis_EW_genome_Assembly_genomic.fna	97.7445
bin150.fna	GCF_000474675.1_Lactobacillus_brevis_EW_genome_Assembly_genomic.fna	97.7445
bin150.fna	GCF_027699065.1_ASM2769906v1_genomic.fna	97.7396
bin150.fna	GCA_027699065.1_ASM2769906v1_genomic.fna	97.7396
bin150.fna	GCA_000814725.1_ASM81472v1_genomic.fna	97.7323
bin150.fna	GCF_002762175.1_ASM276217v1_genomic.fna	97.73
bin150.fna	GCA_002762175.1_ASM276217v1_genomic.fna	97.73
bin150.fna	GCA_006228205.1_ASM622820v1_genomic.fna	97.7283
bin150.fna	GCF_006228205.1_ASM622820v1_genomic.fna	97.7283
bin150.fna	GCF_027698465.1_ASM2769846v1_genomic.fna	97.7254
bin150.fna	GCA_027698465.1_ASM2769846v1_genomic.fna	97.7254
bin150.fna	GCA_002093065.1_ASM209306v1_genomic.fna	97.725
bin150.fna	GCF_002093065.1_ASM209306v1_genomic.fna	97.725
bin150.fna	GCF_000833415.1_ASM83341v1_genomic.fna	97.7186
bin150.fna	GCA_000833415.1_ASM83341v1_genomic.fna	97.7186
bin150.fna	GCA_925285845.1_IM1297_genomic.fna	97.7171
bin150.fna	GCF_925285845.1_IM1297_genomic.fna	97.7171
bin150.fna	GCF_000469365.1_ASM46936v1_genomic.fna	97.7012
bin150.fna	GCA_000469365.1_ASM46936v1_genomic.fna	97.7012
bin150.fna	GCA_001722065.1_ASM172206v1_genomic.fna	97.7007
bin150.fna	GCF_001722065.1_ASM172206v1_genomic.fna	97.7007
bin150.fna	GCF_900475625.1_45709_F01_genomic.fna	97.7006
bin150.fna	GCA_900475625.1_45709_F01_genomic.fna	97.7006
bin150.fna	GCF_001433855.1_ASM143385v1_genomic.fna	97.6898
bin150.fna	GCA_001433855.1_ASM143385v1_genomic.fna	97.6898
bin150.fna	GCF_925281805.1_IM1457_genomic.fna	97.6875
bin150.fna	GCA_925281805.1_IM1457_genomic.fna	97.6875
bin150.fna	GCF_018257185.1_ASM1825718v1_genomic.fna	97.661
bin150.fna	GCA_018257185.1_ASM1825718v1_genomic.fna	97.661
bin150.fna	GCF_900117015.1_ASM90011701v1_genomic.fna	97.6571
bin150.fna	GCA_900117015.1_ASM90011701v1_genomic.fna	97.6571
bin150.fna	GCF_002117345.1_ASM211734v1_genomic.fna	97.6558
bin150.fna	GCA_002117345.1_ASM211734v1_genomic.fna	97.6558
bin150.fna	GCF_018588725.1_ASM1858872v1_genomic.fna	97.6484
bin150.fna	GCA_018588725.1_ASM1858872v1_genomic.fna	97.6484
bin150.fna	GCF_001923045.1_ASM192304v1_genomic.fna	97.6465
bin150.fna	GCA_001923045.1_ASM192304v1_genomic.fna	97.6465
bin150.fna	GCF_018257235.1_ASM1825723v1_genomic.fna	97.6455
bin150.fna	GCA_018257235.1_ASM1825723v1_genomic.fna	97.6455
bin150.fna	GCA_002117375.1_ASM211737v1_genomic.fna	97.6422
bin150.fna	GCF_002117375.1_ASM211737v1_genomic.fna	97.6422
bin150.fna	GCA_018257245.1_ASM1825724v1_genomic.fna	97.639
bin150.fna	GCF_018257245.1_ASM1825724v1_genomic.fna	97.639
bin150.fna	GCF_018257275.1_ASM1825727v1_genomic.fna	97.6321
bin150.fna	GCA_018257275.1_ASM1825727v1_genomic.fna	97.6321
bin150.fna	GCA_018257295.1_ASM1825729v1_genomic.fna	97.6165
bin150.fna	GCF_018257295.1_ASM1825729v1_genomic.fna	97.6165
bin150.fna	GCF_000833395.1_ASM83339v1_genomic.fna	97.6138
bin150.fna	GCA_000833395.1_ASM83339v1_genomic.fna	97.6138
bin150.fna	GCF_900117025.1_ASM90011702v1_genomic.fna	97.6082
bin150.fna	GCA_900117025.1_ASM90011702v1_genomic.fna	97.6082
bin150.fna	GCF_900116945.1_ASM90011694v1_genomic.fna	97.6035
bin150.fna	GCA_900116945.1_ASM90011694v1_genomic.fna	97.6035
bin150.fna	GCA_006228285.1_ASM622828v1_genomic.fna	97.5944
bin150.fna	GCF_006228285.1_ASM622828v1_genomic.fna	97.5944
bin150.fna	GCA_019837695.1_ASM1983769v1_genomic.fna	97.5852
bin150.fna	GCF_000807975.1_ASM80797v1_genomic.fna	97.5812
bin150.fna	GCA_000807975.1_ASM80797v1_genomic.fna	97.5812
bin150.fna	GCF_900116975.1_ASM90011697v1_genomic.fna	97.5715
bin150.fna	GCA_900116975.1_ASM90011697v1_genomic.fna	97.5715
bin150.fna	GCF_900117045.1_ASM90011704v1_genomic.fna	97.5615
bin150.fna	GCA_900117045.1_ASM90011704v1_genomic.fna	97.5615
bin150.fna	GCA_900116995.1_ASM90011699v1_genomic.fna	97.5612
bin150.fna	GCF_900116995.1_ASM90011699v1_genomic.fna	97.5612
bin150.fna	GCF_025194365.1_ASM2519436v1_genomic.fna	97.5173
bin150.fna	GCA_025194365.1_ASM2519436v1_genomic.fna	97.5173
bin150.fna	GCA_006228265.1_ASM622826v1_genomic.fna	97.4921
bin150.fna	GCF_006228265.1_ASM622826v1_genomic.fna	97.4921
bin150.fna	GCF_000875905.1_ASM87590v1_genomic.fna	97.3766
bin150.fna	GCA_000875905.1_ASM87590v1_genomic.fna	97.3766
bin150.fna	GCF_003289085.1_ASM328908v1_genomic.fna	97.3391
bin150.fna	GCA_003289085.1_ASM328908v1_genomic.fna	97.3391
bin150.fna	GCF_002117325.1_ASM211732v1_genomic.fna	97.3348
bin150.fna	GCA_002117325.1_ASM211732v1_genomic.fna	97.3348
bin150.fna	GCF_000833405.1_ASM83340v1_genomic.fna	97.3327
bin150.fna	GCA_000833405.1_ASM83340v1_genomic.fna	97.3327
bin150.fna	GCF_002117225.1_ASM211722v1_genomic.fna	97.3282
bin150.fna	GCA_002117225.1_ASM211722v1_genomic.fna	97.3282
bin150.fna	GCF_002179515.1_ASM217951v1_genomic.fna	97.3164
bin150.fna	GCA_002179515.1_ASM217951v1_genomic.fna	97.3164
bin150.fna	GCF_006382065.1_ASM638206v1_genomic.fna	97.3153
bin150.fna	GCA_006382065.1_ASM638206v1_genomic.fna	97.3153
bin150.fna	GCF_025194285.1_ASM2519428v1_genomic.fna	97.3145
bin150.fna	GCA_025194285.1_ASM2519428v1_genomic.fna	97.3145
bin150.fna	GCA_006381935.1_ASM638193v1_genomic.fna	97.3091
bin150.fna	GCF_006381935.1_ASM638193v1_genomic.fna	97.3091
bin150.fna	GCA_020741515.1_ASM2074151v1_genomic.fna	97.2988
bin150.fna	GCA_003184305.1_ASM318430v1_genomic.fna	97.2983
bin150.fna	GCF_003184305.1_ASM318430v1_genomic.fna	97.2983
bin150.fna	GCF_027591835.1_ASM2759183v1_genomic.fna	97.2303
bin150.fna	GCA_027591835.1_ASM2759183v1_genomic.fna	97.2303
bin150.fna	GCF_002532185.1_ASM253218v1_genomic.fna	97.221
bin150.fna	GCA_002532185.1_ASM253218v1_genomic.fna	97.221
bin150.fna	GCA_002933755.1_ASM293375v1_genomic.fna	97.1809
bin150.fna	GCF_002933755.1_ASM293375v1_genomic.fna	97.1809
bin150.fna	GCF_900452615.1_49888_E01_genomic.fna	97.1695
bin150.fna	GCA_900452615.1_49888_E01_genomic.fna	97.1695
bin150.fna	GCA_021728655.1_ASM2172865v1_genomic.fna	97.0646
bin150.fna	GCA_003666485.1_ASM366648v1_genomic.fna	79.1093
bin150.fna	GCF_003666485.1_ASM366648v1_genomic.fna	79.1093
bin150.fna	GCA_021383565.1_ASM2138356v1_genomic.fna	78.8069
bin150.fna	GCF_021383565.1_ASM2138356v1_genomic.fna	78.8069
